# Supplementary material for: Curcumin-p-sulfonatocalix[4]resorcinarene (p-SC[4]R) interaction: thermo-physico chemistry, stability and biological evaluation
Source: Royal Society of Chemistry journal article supplement (doi:10.1039/c4ra12047g), 2014-12-11
Supplement: c4ra12047g1.pdf [file c4ra12047g1.pdf]

## Supporting information

### **Curcumin- *p*-sulfonatocalix[4]resorcinarene (*p*-SC[4]R) interaction: Thermo-Physico chemistry, Stability and biological evaluation**

Nikunj N. Valand, Manishkumar B. Patel and Shobhana K. Menon\*

*Department of Chemistry,  
University School of Sciences, Gujarat University, Ahmedabad, Gujarat- 380009, India.*

#### **Table of Contents**

- 1. HPLC graph of Figure S<sub>1</sub>**
- 2. In vitro dissolution study of Figure S<sub>2</sub>**
- 3. Phase solubility study of Figure S<sub>3</sub>**
- 4. Stability study of Figure S<sub>4</sub> & S<sub>5</sub>**

## 1. HPLC graph of Figure S<sub>1</sub>

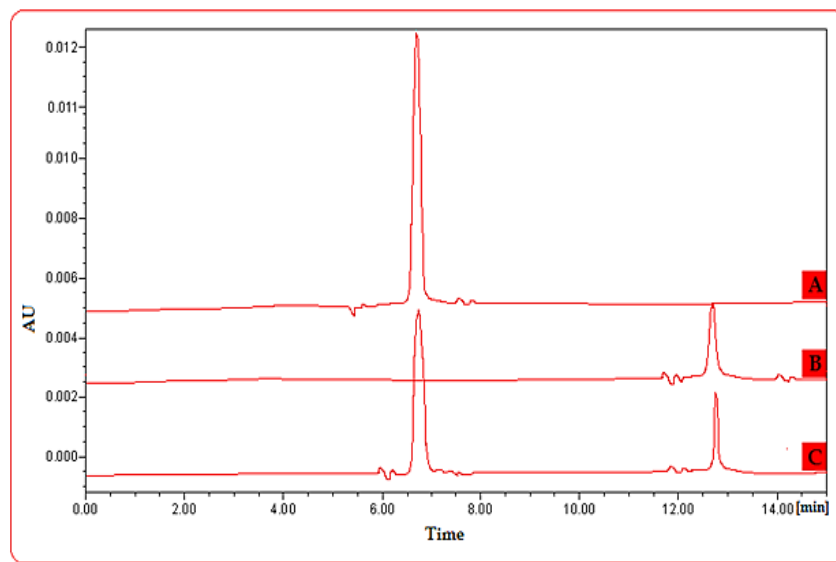

**Fig. S<sub>1</sub>** HPLC chromatogram of (A) Pure curcumin, (B) *p*-SC[4]R and (C) Inclusion complex.

## 2. *In vitro* dissolution study of Figure S<sub>2</sub>

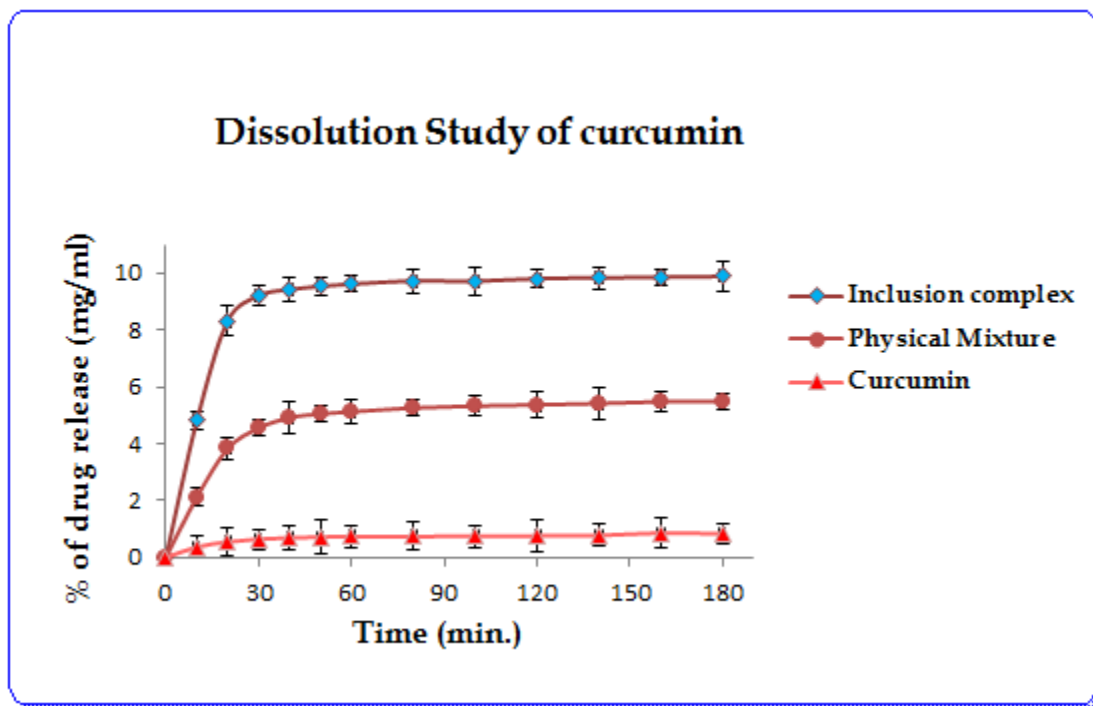

**Fig. S<sub>2</sub>** *In vitro* dissolution profiles of pure curcumin, physical mixture and curcumin / *p*-SC[4]R inclusion complex.

## 3. Phase solubility study of Figure S<sub>3</sub>

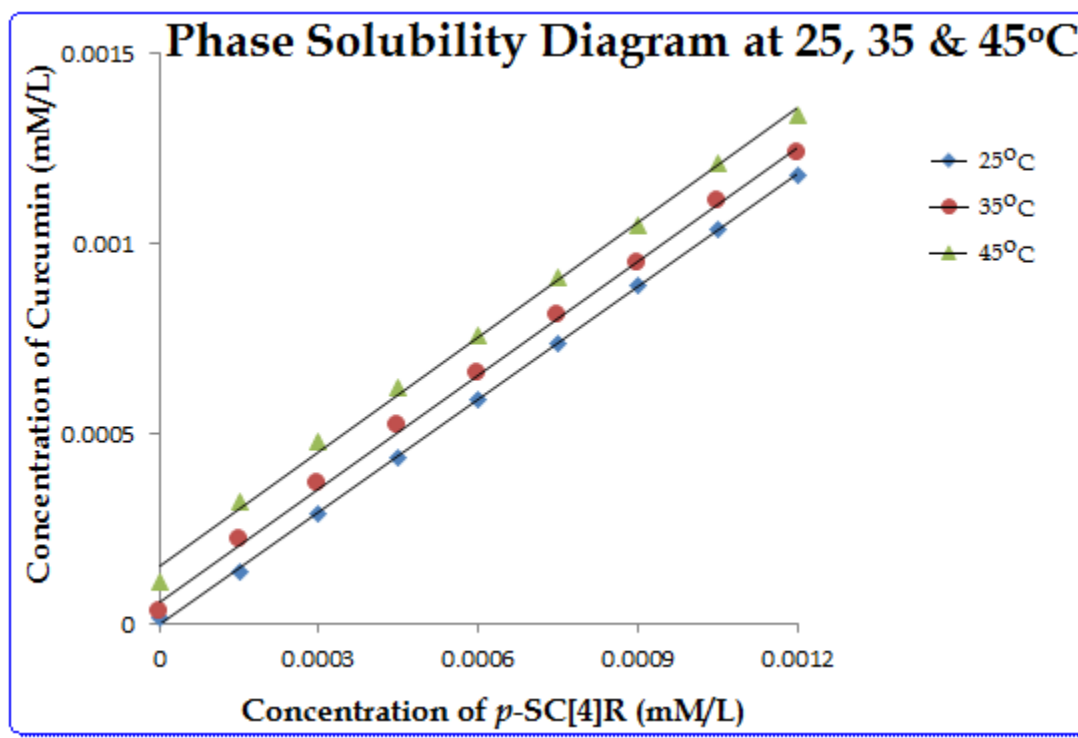

**Fig. S<sub>3</sub>** The phase solubility diagrams of curcumin with *p*-SC[4]R at 25, 35 and 45 °C.

#### 4. Stability study of Figure S<sub>4</sub> & S<sub>5</sub>

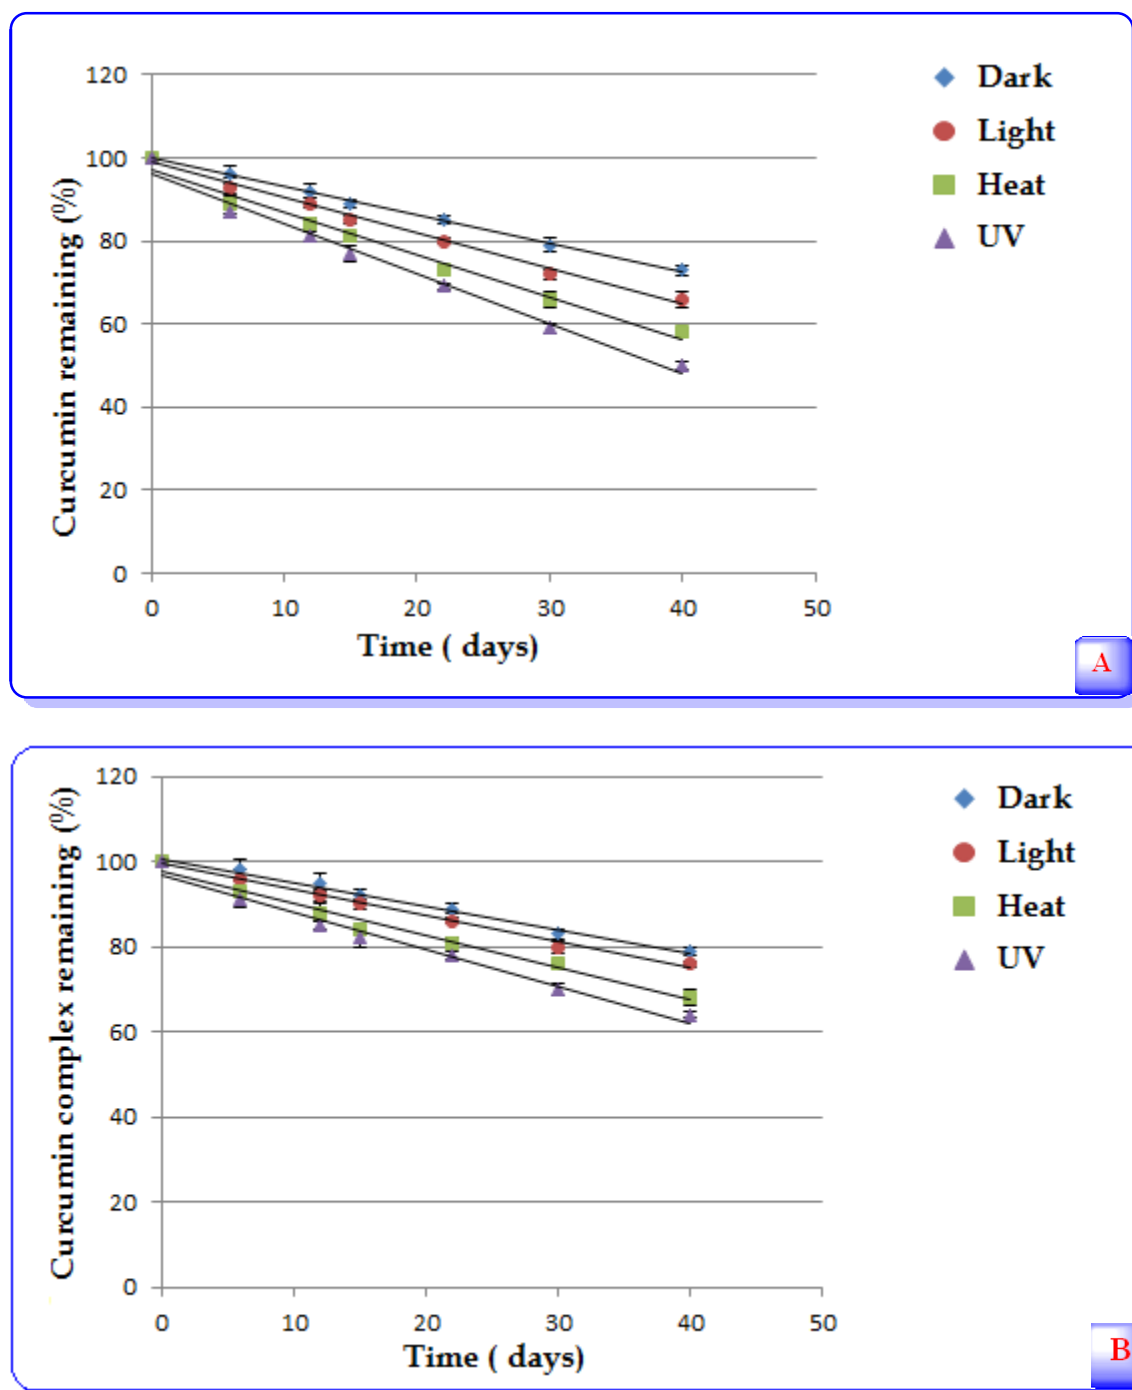

**Fig. S<sub>4</sub>** Degradation pattern of substances during storage by dark, light, heat and UV radiation; (A) curcumin and (B) curcumin with *p*-SC[4]R inclusion complex.

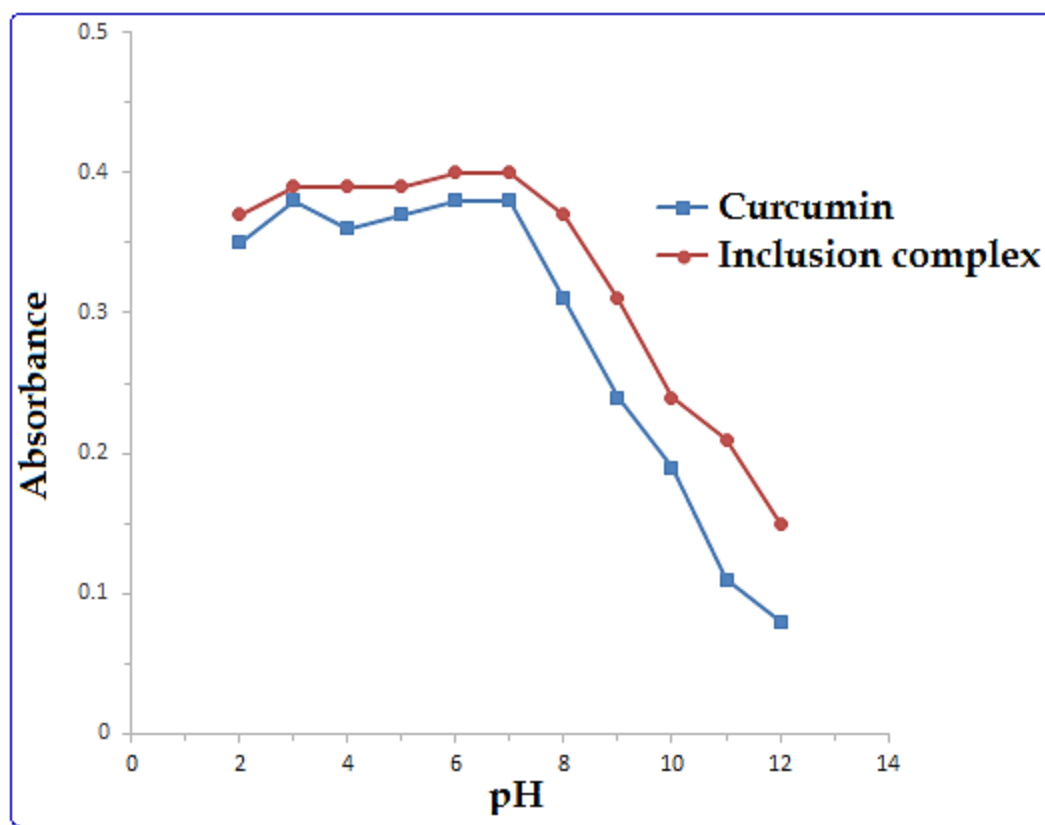

**Fig. S<sub>5</sub>** The stability of curcumin and curcumin / *p*-SC[4]R complex in the different pH.
